# Supplementary material for: Complete Sequencing of Five Araliaceae Chloroplast Genomes and the Phylogenetic Implications
Source: PubMed Central journal article supplement (PMC3799623; doi:10.1371/journal.pone.0078568), 2013-10-18

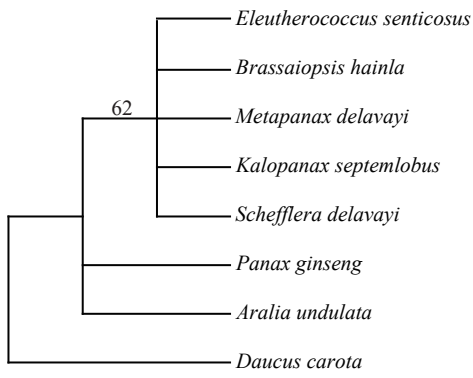

***trnK(UUU)-rps16***

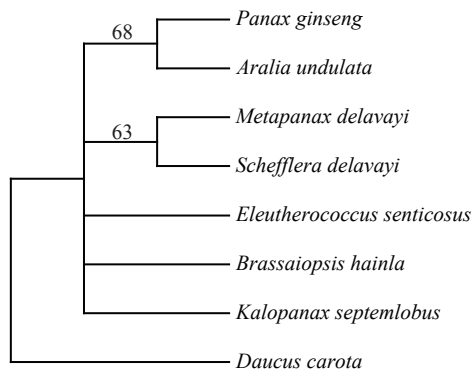

***trnC(GCA)-petN***

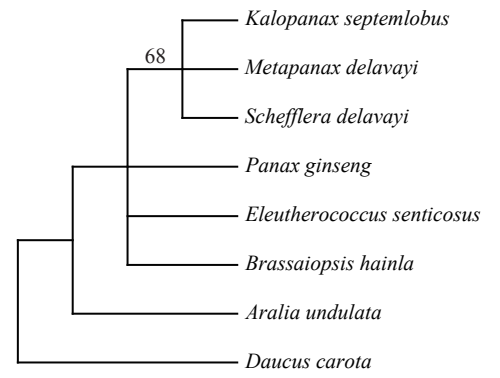

***psbK-psbI***

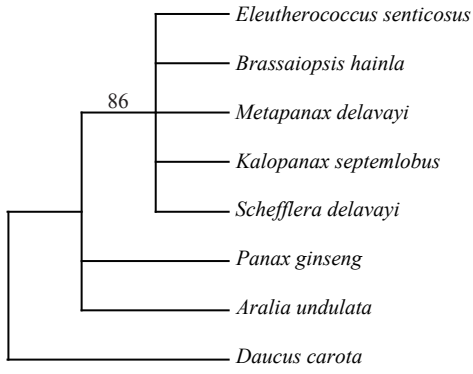

***trnE(UUC)-trnT(GGU)***

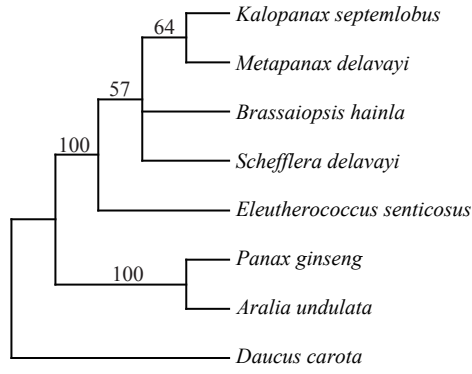

***ycf1***

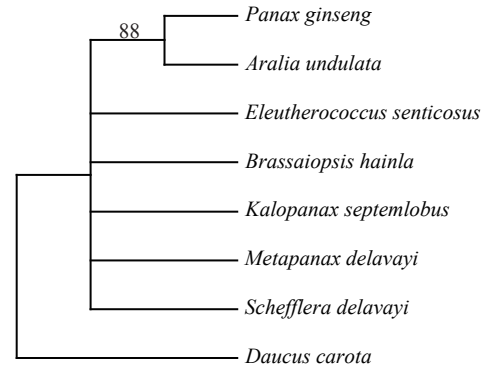

***rps16-trnQ(UUG)***

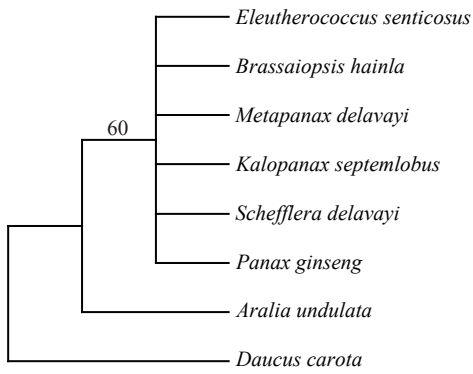

***psaJ-rpl33***

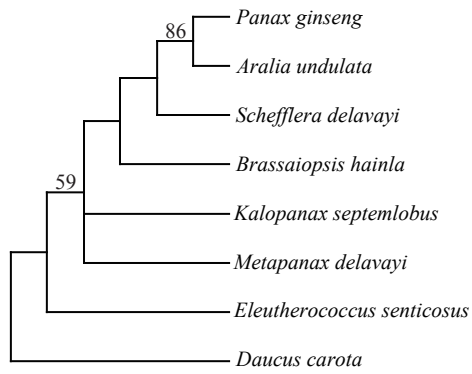

***ndhF-rpl32***

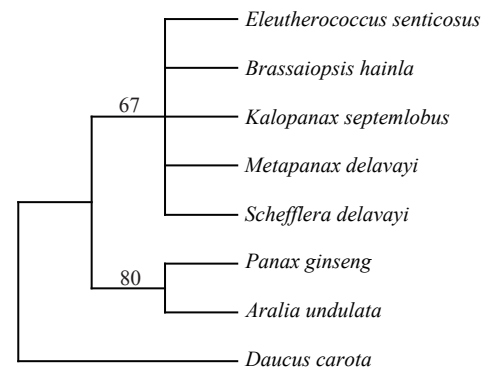

***trnT(UGU)-trnL(UAA)***

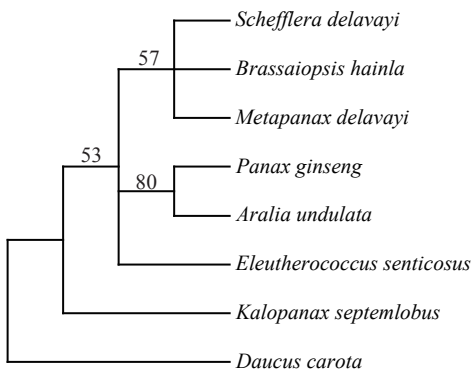

***rps15-ycf1***

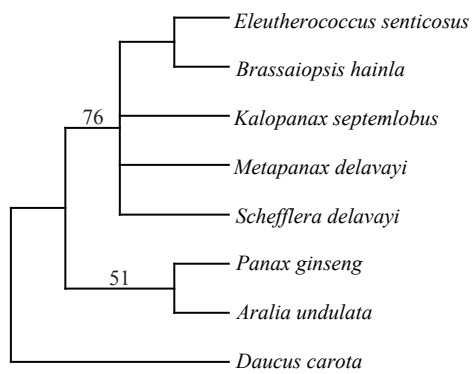

***rpl32-trnL(UAG)***

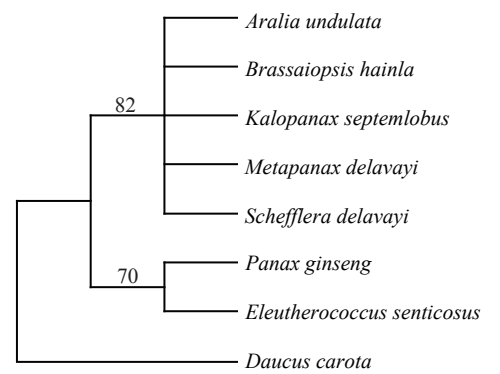

***petB-intron***

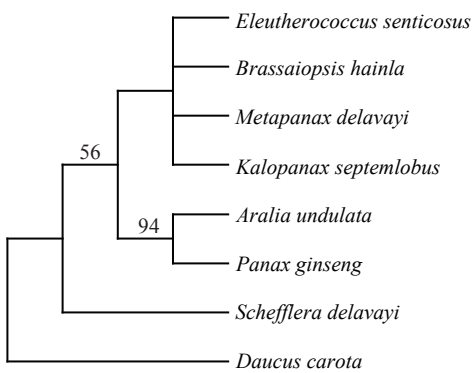

***trnS(GCU)-trnG(UCC)***

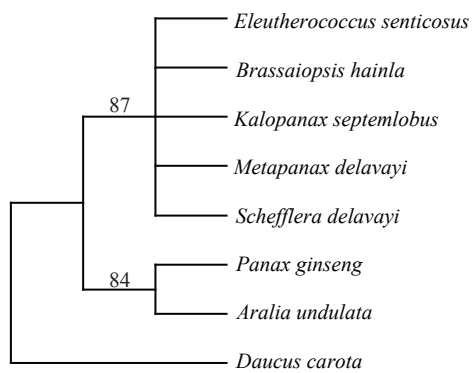

***ycf3-trnS(GGA)***

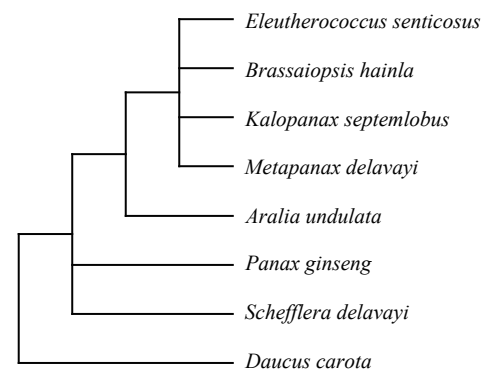

***ndhG-ndhI***

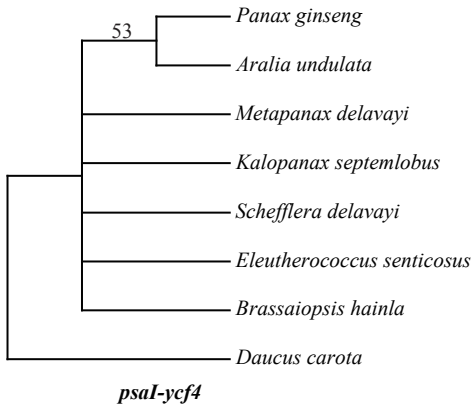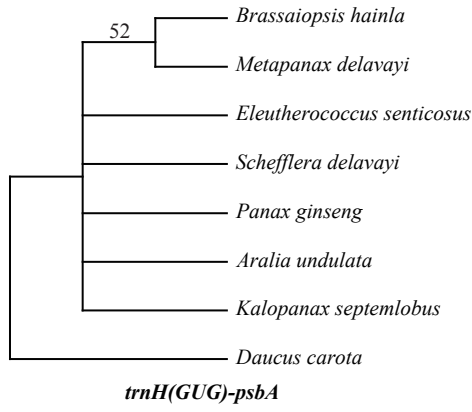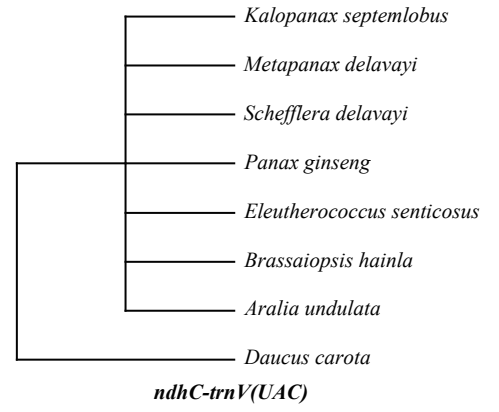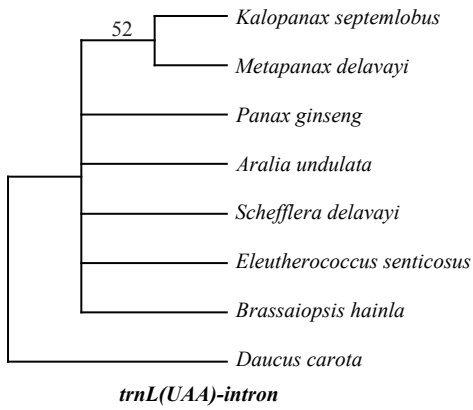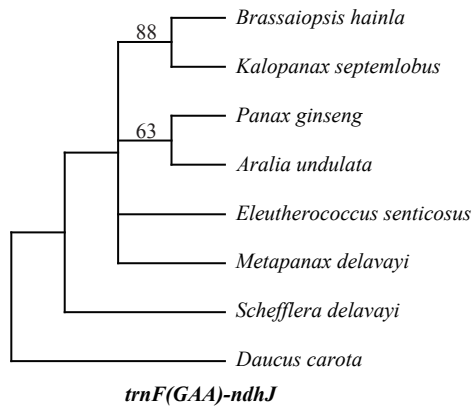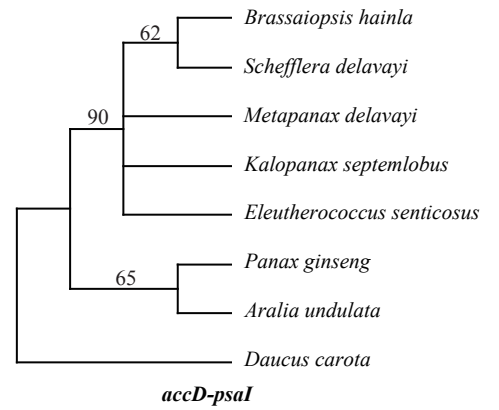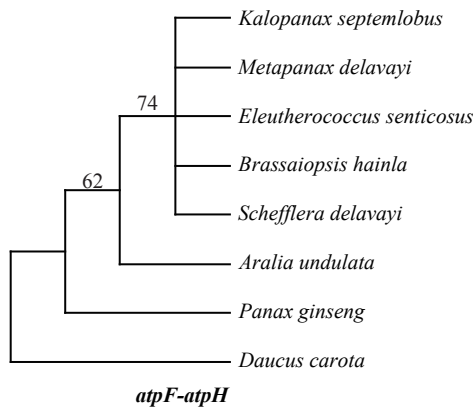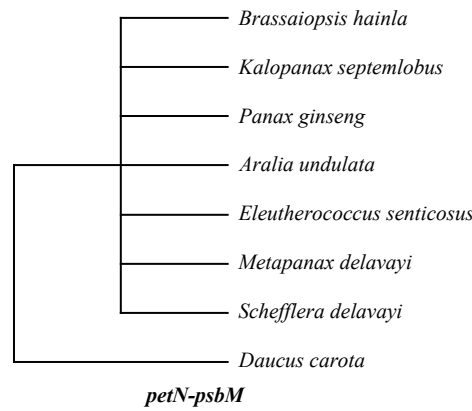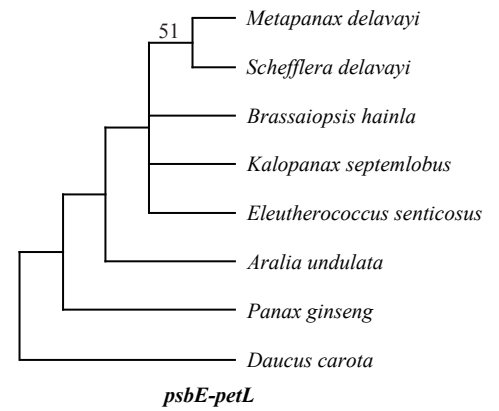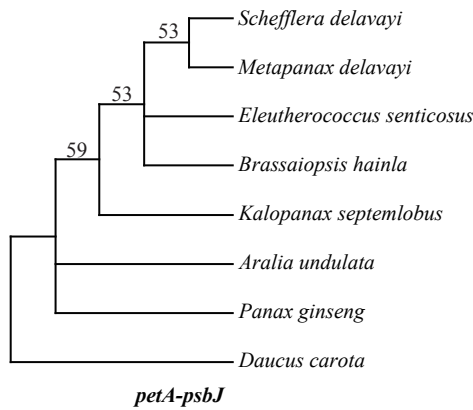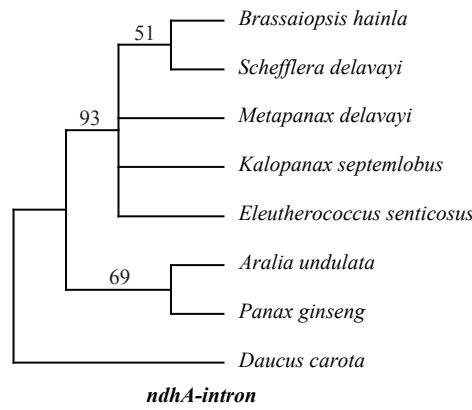

Supplement: pone.0078568.s001.pdf [file pone.0078568.s001.pdf]
